# Supplementary material for: Assembly of normal actomyosin rings in the absence of Mid1p and cortical nodes in fission yeast
Source: PubMed Central journal article supplement — J Cell Biol. 2008 Dec 15;183(6):979–88. doi: 10.1083/jcb.200806151 (PMC2600752; doi:10.1083/jcb.200806151), 2008-12-15
Supplement: jcb.200806151_1.pdf [file jcb.200806151_1.pdf]

Huang et al., <http://www.jcb.org/cgi/content/full/jcb.200806151/DC1>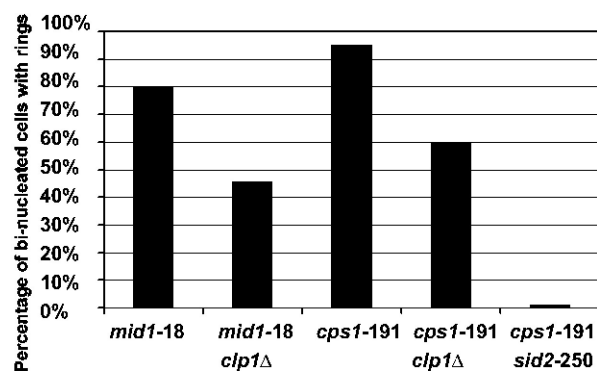

Figure S1. **Actomyosin ring/bundle assembly and maintenance in the absence of Mid1p and the cortical nodes depend on the SIN.** The fact that actomyosin bundle and ring assembly was significantly compromised in *mid1Δ clp1Δ* cells [Clp1p is a positive regulator of the SIN; Trautmann, S., B.A. Wolfe, P. Jorgensen, M. Tyers, K.L. Gould, and D. McCollum. 2001. *Curr. Biol.* 11:931–940] further established that ring assembly in the absence of Mid1p and the cortical nodes depended on the SIN. Additional genetic studies [Liu, J., H. Wang, D. McCollum, and M.K. Balasubramanian. 1999. *Genetics*. 153:1193–1203] showed the inability of *cps1-191 sid2-250* [*sid2-250* encodes a defective version of the SIN component Sid2p; Balasubramanian, M.K., D. McCollum, L. Chang, K.C. Wong, N.I. Naqvi, X. He, S. Sazer, and K.L. Gould. 1998. *Genetics*. 149:1265–1275; Sparks, C.A., M. Morphew, and D. McCollum. 1999. *J. Cell Biol.* 146:777–790] and a reduced ability of *cps1-191 clp1Δ* cells to assemble and maintain actomyosin rings. These genetic studies provided further evidence that the organization of actomyosin bundles in *mid1* mutants and their reorganization in the *cps1-191* background depended on the function of the SIN. The figure shows quantitation of the presence of actomyosin rings/cables in binucleate cells of *mid1-18*, *mid1-18 clp1Δ*, *cps1-191*, *cps1-191 clp1Δ*, and *cps1-191 sid2-250*. Cells of the indicated genotypes were cultured at 25°C and were shifted to 36°C for 3.5 h, fixed, and stained with phalloidin and DAPI to visualize actomyosin rings/bundles and the nuclei, respectively. At least 200 cells were scored for each genotype.
